# Supplementary figures and images for: MLPA for confirmation of array CGH results and determination of inheritance
Source: Springer Nature journal article supplement (doi:10.1186/1755-8166-3-19), 2010-01-01

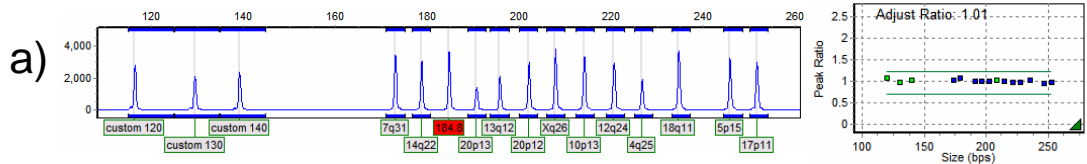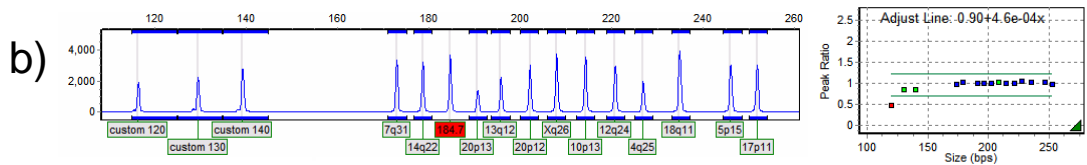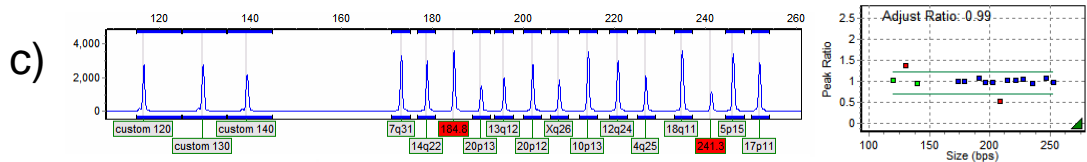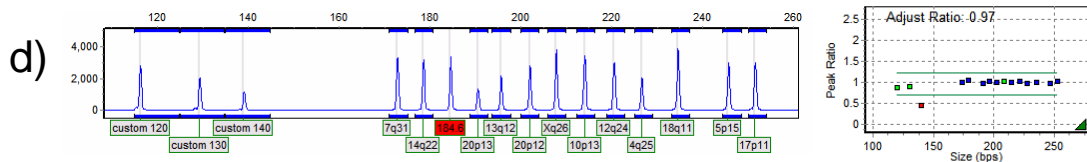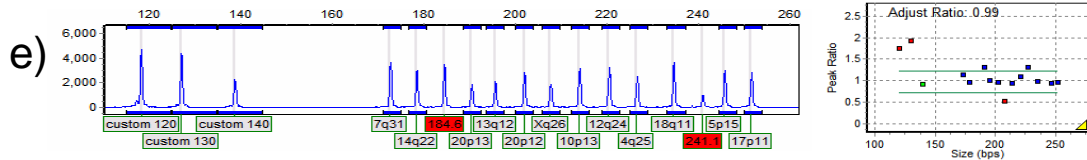

Supplement: 13039_2010_74_MOESM1_ESM.pdf [file 13039_2010_74_MOESM1_ESM.pdf]

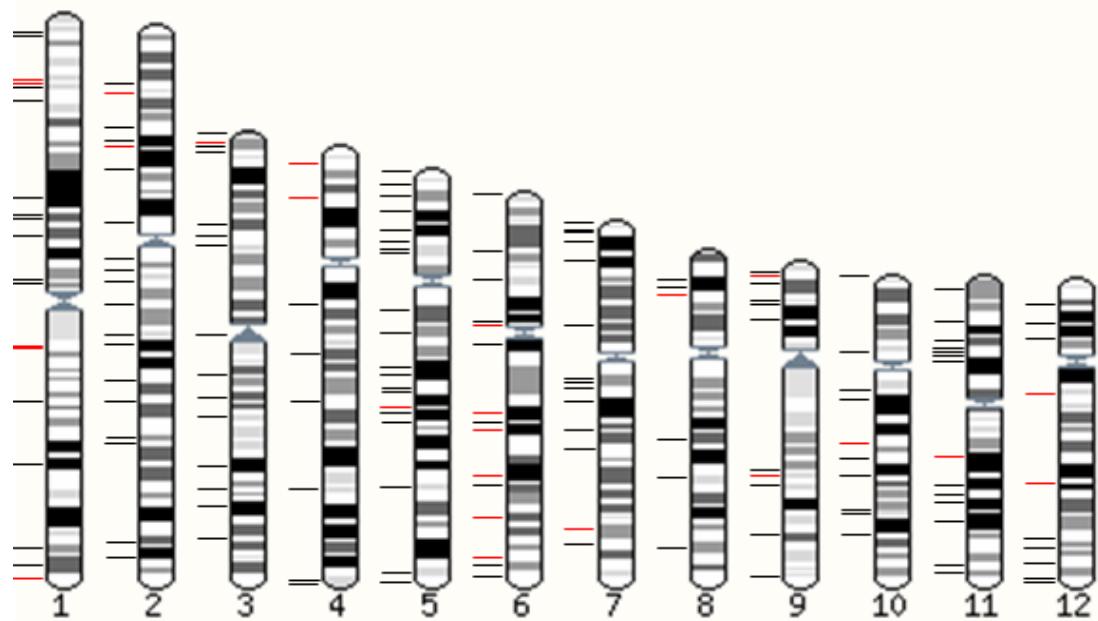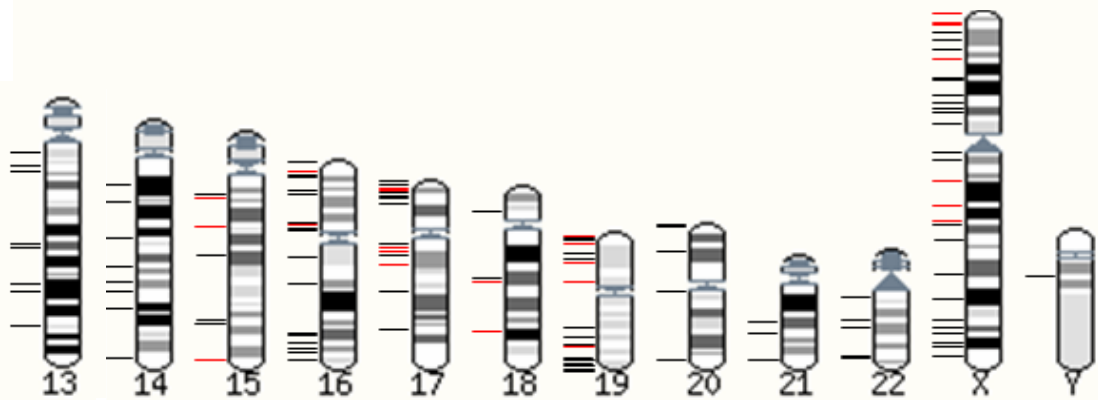

Supplement: 13039_2010_74_MOESM2_ESM.pdf [file 13039_2010_74_MOESM2_ESM.pdf]
